# Supplementary material for: Synthesis and evaluation of protein conjugates of GM3 derivatives carrying modified sialic acids as highly immunogenic cancer vaccine candidates
Source: Royal Society of Chemistry journal article supplement (doi:10.1039/c1md00033k), 2011-01-01
Supplement: c1md00033k.pdf [file c1md00033k.pdf]

## Supplementary Information

For

### Synthesis and Evaluation of Protein Conjugates of GM3 Derivatives Carrying Modified Sialic Acids as Highly Immunogenic Cancer Vaccine Candidates

Shichong Yu,<sup>a,b</sup> Qianli Wang,<sup>b</sup> Junping Zhang,<sup>a</sup> Qiuye Wu,<sup>a,\*</sup> and Zhongwu Guo<sup>b,\*</sup>

<sup>a</sup> School of Pharmacy, Second Military Medical University, 325 Guohe Road, Shanghai, 200433, China

<sup>b</sup> Department of Chemistry, Wayne State University, 5101 Cass Avenue, Detroit, Michigan 48202, USA

\* To whom correspondence should be addressed. Phone: +86-21-8187-1225 (Q.W.), +1-313-577-2557 (Z.G.); Fax: +86-21-8187-1225 (Q.W.), +1-313-577-8822 (Z.G.); Email: wuqy6439@sohu.com (Q.W.), zwguo@chem.wayne.edu (Z.G.).

#### Table of Contents

|                                     |             |
|-------------------------------------|-------------|
| Experimental                        | S-1 to S-7  |
| References                          | S-7         |
| NMR and MS spectra of new compounds | S-7 to S-17 |

#### Experimental

**General Methods.** NMR spectra were recorded on a 400 or 500 MHz instrument with chemical shifts reported in ppm ( $\delta$ ) in reference to Me<sub>4</sub>Si if not specified otherwise and coupling constants ( $J$ ) in hertz (Hz). High resolution electron spray ionization mass spectra (HR ESI MS) were obtained with a Waters Micromass-LCTPremier-XE mass spectrometer, and matrix-assisted laser desorption ionization time of fly (MALDI-TOF) MS were obtained with a Bruker Ultraflex instrument. Thin layer chromatography (TLC) was performed on silica gel GF254 plates with detection by phosphomolybdic acid in EtOH or 1% H<sub>2</sub>SO<sub>4</sub> in EtOH. Molecular sieves were dried under high vacuum at 170-180 °C for 6-10 h just before use. Commercial anhydrous solvents and other reagents were used without further purification. GM3NPhAc conjugates **1a** and **2a** and the HSA conjugate of GM3 were previously prepared by our laboratory.<sup>1</sup>

**2-Azidoethyl (Methyl 4,7,8,9-tetra-*O*-acetyl-3,5-dideoxy-5-trifluoroacetamido-D-glycero- $\alpha$ -D-galacto-non-2-ulopyranosylate)-(2 $\rightarrow$ 3)-(2,6-di-*O*-acetyl- $\beta$ -D-galactopyranosyl)-(1 $\rightarrow$ 4)-2,3,6-tri-*O*-acetyl-D-glucopyranoside (5).** A mixture of glycosyl donor **3** (1.0 g, 1.69 mol), acceptor **4** (500 mg, 0.805 mmol), and activated molecular sieves (4Å, 2.0 g) in anhydrous acetonitrile (5.0 mL) was stirred at rt for 24 h under argon. After the mixture was cooled to -35 °C, NIS (764 mg, 3.38 mmol) was added, and 30 min later, TfOH (74.5  $\mu$ L, 0.17 mmol) was added. The mixture was kept at -35 °C for 1 h and then diluted with dichloromethane (DCM). The solid material was filtered off and washed with DCM. The combined filtrates were washed with aqueous NaS<sub>2</sub>O<sub>3</sub> (20%) and water. The organic phase was dried over Na<sub>2</sub>SO<sub>4</sub> and concentrated in vacuum. Silica gel column chromatography of the residue afforded the desired trisaccharide **5** (410 mg, 63%). <sup>1</sup>H NMR(CDCl<sub>3</sub>, 400 MHz):  $\delta$  6.46 (d, 1H, *J* = 8.0 Hz, NH), 5.51-5.49 (m, 1H, H-8''), 5.36 (dd, 1H, *J* = 8.8, 2.4 Hz, H-7''), 5.17 (t, 1H, *J* = 8.8 Hz, H-2), 5.00-4.98 (m, 1H, H-2'), 4.94 (d, 1H, *J* = 8.8 Hz, H-1), 4.94-4.90 (m, 1H, H-4''), 4.54 (d, 1H, *J* = 8.4 Hz, H-1'), 4.46-4.44 (m, 1H, H-6), 4.42-4.40 (m, 1H, H-9''), 4.30-4.27 (m, 1H, H-3'), 4.23 (d, 1H, *J* = 6.8 Hz, H-1'), 4.19-4.15 (m, 1H, H-6), 4.08-4.04 (m, 1H, H-9''), 4.03-4.00 (m, 1H, H-5''), 3.99-3.95 (m, 1H, -OCH<sub>2</sub>CH<sub>2</sub>N<sub>3</sub>), 3.87-3.82 (m, 1H, H-3), 3.79 (s, 3H, -OCH<sub>3</sub>), 3.83-3.79 (m, 1H, H-5'), 3.70-3.68 (m, 1H, -OCH<sub>2</sub>CH<sub>2</sub>N<sub>3</sub>), 3.67-3.63 (m, 1H, H-5), 3.62-3.59 (m, 1H, H-4), 3.50-3.44 (m, 1H, -OCH<sub>2</sub>CH<sub>2</sub>N<sub>3</sub>), 3.38 (bs, 1H, H-4'), 3.29-3.25 (m, 1H, -OCH<sub>2</sub>CH<sub>2</sub>N<sub>3</sub>), 2.69 (dd, 1H, *J* = 9.2, 4.8 Hz, H-3''e), 2.44 (bs, 1H, OH), 2.21, 2.13, 2.09, 2.09, 2.08, 2.05, 2.03, 2.03, 2.01 (9s, 9x3H, OAc), 1.78-1.84 (m, 1H, H-3''a). <sup>19</sup>F NMR (CDCl<sub>3</sub>):  $\delta$  -76.61 (s). <sup>13</sup>C NMR (CDCl<sub>3</sub>, 100 MHz):  $\delta$  171.2, 170.9, 170.9, 170.8, 170.7, 170.2, 170.0, 169.7, 168.4, 101.1, 100.7, 97.1, 76.5, 74.1, 73.2, 73.0, 71.9, 71.9, 71.7, 69.8, 68.8, 67.3, 67.1, 62.9, 62.4, 53.5, 50.7, 50.0, 37.8, 21.6, 21.1, 21.0, 20.9, 20.9, 20.8, 20.7. MALDI-TOF MS Calcd for C<sub>44</sub>H<sub>59</sub>F<sub>3</sub>N<sub>4</sub>NaO<sub>28</sub> [M+Na]<sup>+</sup>: 1171.3; Found: 1171.3.

***N*-{2-*O*-[(Methyl 4,7,8,9-tetra-*O*-acetyl-3,5-dideoxy-5-trifluoroacetamido-D-glycero- $\alpha$ -D-galacto-non-2-ulopyranosylate)-(2 $\rightarrow$ 3)-(2,6-di-*O*-acetyl- $\beta$ -D-galactopyranosyl)-(1 $\rightarrow$ 4)-2,3,6-tri-*O*-acetyl-D-glucopyranosyl]-ethyl} 4-Pentenamide (6).** After a solution of **5** (140 mg, 0.122 mmol) in CH<sub>3</sub>OH (4.0 mL) was stirred with Pd/C (100 mg) under a H<sub>2</sub> atmosphere at rt for 2 h, 4-pentenoic anhydride (50  $\mu$ L, 0.244 mmol) and triethyl amine (50  $\mu$ L) were added. The mixture was stirred at rt overnight, and then the solid material was filtered off. The filtrate was condensed under reduced pressure. The residue was purified by column chromatography to afford **6** (91 mg, 62%, 2 step overall) as a white solid. <sup>1</sup>H NMR(CDCl<sub>3</sub>, 400 MHz):  $\delta$  6.96 (d, 1H, *J* = 9.6 Hz, NH), 6.00 (t, 1H, *J* = 5.2 Hz,

NH), 5.84-5.74 (m, 1H, CH=CH<sub>2</sub>), 5.52-5.48 (m, 1H, H-8''), 5.36 (dd, 1H, *J* = 8.8, 2.4 Hz, H-7''), 5.15 (t, 1H, *J* = 9.2 Hz, H-2), 5.07-5.02 (m, 1H, H-2'), 4.98 (d, 1H, *J* = 8.0 Hz, H-1), 4.97-4.85 (m, 1H, H-4''), 4.55 (d, 1H, *J* = 8.0 Hz, H-1'), 4.47-4.44 (m, 1H, H-6), 4.42-4.38 (m, 1H, H-9''), 4.27 (dd, 1H, *J* = 9.6, 2.4 Hz, H-3'), 4.22 (d, 1H, *J* = 5.6 Hz, H-1'), 4.18-4.14 (m, 1H, H-6), 4.10-4.07 (m, 1H, H-9''), 4.04-4.02 (m, 1H, H-5''), 4.01-3.94 (m, 1H, -OCH<sub>2</sub>CH<sub>2</sub>N<sub>3</sub>), 3.83-3.78 (m, 1H, H-3), 3.77 (s, 3H, -OCH<sub>3</sub>), 3.77-3.75 (m, 1H, H-5'), 3.70-3.67 (m, 1H, -OCH<sub>2</sub>CH<sub>2</sub>N<sub>3</sub>), 3.66-3.62 (m, 1H, H-5), 3.60-3.57 (m, 1H, H-4), 3.46-3.41 (m, 1H, -OCH<sub>2</sub>CH<sub>2</sub>N<sub>3</sub>), 3.39-3.37 (m, 1H, -OCH<sub>2</sub>CH<sub>2</sub>N<sub>3</sub>), 3.37 (d, 1H, *J* = 3.6 Hz, H-4'), 2.71-2.66 (m, 1H, H-3''e), 2.38-2.33 (m, 2H, -CH<sub>2</sub>CH<sub>2</sub>CH=CH<sub>2</sub>), 2.26-2.24 (m, 2H, -CH<sub>2</sub>CH=CH<sub>2</sub>), 2.21, 2.12, 2.08, 2.07, 2.07, 2.04, 2.02, 2.02, 1.99 (9s, 9x3H, OAc), 1.78 (t, 1H, *J* = 12.8 Hz, H-3''a). <sup>19</sup>F NMR (CDCl<sub>3</sub>): δ -76.58 (s). <sup>13</sup>C NMR (CDCl<sub>3</sub>, 100 MHz): δ 172.4, 170.7, 170.6, 170.5, 170.4, 169.8, 169.8, 169.6, 169.4, 168.1, 136.8, 76.0, 73.7, 72.9, 72.8, 71.6, 69.5, 69.2, 68.3, 68.0, 67.0, 66.8, 62.6, 62.1, 53.2, 49.7, 39.1, 37.5, 35.6, 29.5, 21.3, 20.8, 20.7, 20.6, 20.5, 20.5, HR ESI MS (*m/z*) Calcd. for C<sub>49</sub>H<sub>67</sub>F<sub>3</sub>N<sub>2</sub>NaO<sub>29</sub> [M+Na]<sup>+</sup>: 1227.3679; Found: 1227.3717.

**General procedure for the synthesis of compounds 7b-e.** Compound **6** (30 mg, 0.025 mmol) was dissolved in 0.5 N aq. NaOH (2.0 mL), and the solution was stirred at rt for 10 h. After neutralization and condensation under reduced pressure, the crude product was directly used for the acylation. To a solution of the resultant amine (20 mg, 0.03 mmol) in 2.5 mL of MeOH and 0.5 mL of NaOH (0.5 N) was added 0.1 mL of an acyl anhydride dropwise in an ice-water bath. After the reaction is finished (in 6 h) as indicated by TLC, the mixture was condensed under reduced pressure. The residue was purified on a Biogel P-2 column with H<sub>2</sub>O as the eluent. Fractions containing the expected product were combined and freeze-dried to afford compound **7b-e** after lyophilization as a white solid.

***N*-{2-*O*-{[3,5-Dideoxy-5-(*p*-methylphenylacetamido)-D-glycero- $\alpha$ -D-galacto-2-**

**nonulopyranosylonic acid]-(2 $\rightarrow$ 3)- $\beta$ -D-galactopyranosyl-(1 $\rightarrow$ 4)-D-glucopyranosyl}-ethyl} 4-**

**Pentenamide (7b).** <sup>1</sup>H NMR (D<sub>2</sub>O, 400 MHz): δ 7.23-7.21 (m, 4H, aromatic H), 5.86-5.76 (m, 1H,

CH=CH<sub>2</sub>), 5.08-5.00 (m, 2H, CH=CH<sub>2</sub>), 4.50-4.46 (m, 2H), 4.08-4.06 (m, 2H), 3.97-3.90 (m, 3H),

3.83-3.37 (m, 20H), 3.32-3.27 (m, 2H), 2.73 (dd, 1H, *J* = 12.0, 4.0 Hz, H-3''e), 2.33-2.31 (m, 4H,

COCH<sub>2</sub>CH<sub>2</sub>CH=CH<sub>2</sub>), 2.30 (s, 3H, PhCH<sub>3</sub>), 1.76 (t, 1H, *J* = 12.0 Hz, H-3''a). <sup>13</sup>C NMR (D<sub>2</sub>O, 100

MHz): δ 176.7, 176.1, 174.1, 137.8, 137.3, 132.2, 129.8, 129.3, 115.9, 102.9, 102.5, 100.0, 78.5, 74.5, 73.1, 73.1, 72.1, 69.6, 68.9, 68.4, 68.4, 67.7, 62.9, 61.3, 60.3, 52.0, 42.5, 40.0, 39.5, 35.3, 29.6, 20.4.

HR ESI MS (*m/z*) Calcd. for C<sub>37</sub>H<sub>55</sub>N<sub>2</sub>O<sub>20</sub> [M - H]<sup>+</sup>: 847.3348; Found: 847.3332.

***N*-{2-*O*-[3,5-Dideoxy-5-(*p*-methoxyphenylacetamido)-*D*-glycero- $\alpha$ -*D*-galacto-2-nonulopyranosylonic acid]-(2 $\rightarrow$ 3)- $\beta$ -*D*-galactopyranosyl-(1 $\rightarrow$ 4)-*D*-glucopyranosyl}-ethyl} 4-Pentenamide (7c).**  $^1\text{H}$  NMR ( $\text{D}_2\text{O}$ , 400 MHz):  $\delta$  7.25 (d, 2H,  $J$  = 8.8 Hz, aromatic H), 6.97 (d, 2H,  $J$  = 8.0 Hz, aromatic H), 5.86-5.79 (m, 1H,  $\text{CH}=\text{CH}_2$ ), 5.09-5.00 (m, 2H,  $\text{CH}=\text{CH}_2$ ), 4.68-4.48 (m, 2H), 4.09-4.05 (m, 1H), 3.98-3.90 (m, 2H), 3.81 (s, 3H,  $\text{PhOCH}_3$ ), 3.79-3.27 (m, 24H), 2.73 (dd, 1H,  $J$  = 12.0, 4.0 Hz, H-3''e), 2.35-2.31 (m, 4H,  $\text{COCH}_2\text{CH}_2\text{CH}=\text{CH}_2$ ), 1.76 (t, 1H,  $J$  = 12.0 Hz, H-3'a).  $^{13}\text{C}$  NMR ( $\text{D}_2\text{O}$ , 100 MHz): 176.7, 176.2, 174.2, 158.3, 137.3, 130.6, 127.9, 115.9, 114.7, 103.0, 102.6, 100.1, 78.6, 74.6, 73.2, 73.1, 72.1, 69.7, 68.9, 68.5, 68.4, 67.7, 63.0, 61.3, 60.3, 55.7, 52.0, 42.0, 40.1, 39.5, 35.3, 29.6. HR ESI MS ( $m/z$ ) Calcd. for  $\text{C}_{37}\text{H}_{55}\text{N}_2\text{O}_{21}$  [ $\text{M} - \text{H}$ ] $^+$ : 863.3297; Found: 863.3317.

***N*-{2-*O*-[5-(*p*-Acetophenylacetamido)-3,5-dideoxy-*D*-glycero- $\alpha$ -*D*-galacto-2-nonulopyranosylonic acid]-(2 $\rightarrow$ 3)- $\beta$ -*D*-galactopyranosyl-(1 $\rightarrow$ 4)-*D*-glucopyranosyl}-ethyl} 4-Pentenamide (7d).**  $^1\text{H}$  NMR ( $\text{D}_2\text{O}$ , 400 MHz):  $\delta$  7.97 (d, 2H,  $J$  = 8.0 Hz, aromatic H), 7.45 (d, 2H,  $J$  = 8.0 Hz, aromatic H), 5.88-5.80 (m, 1H,  $\text{CH}=\text{CH}_2$ ), 5.09-5.01 (m, 2H,  $\text{CH}=\text{CH}_2$ ), 4.50-4.46 (m, 2H), 4.10-4.06 (m, 1H), 3.98-3.93 (m, 3H), 3.86-3.28 (m, 24H), 2.74 (dd, 1H,  $J$  = 12.0, 4.0 Hz, H-3''e), 2.65 (s, 3H,  $\text{COCH}_3$ ), 2.34-2.33 (m, 4H,  $\text{COCH}_2\text{CH}_2\text{CH}=\text{CH}_2$ ), 1.78 (t, 1H,  $J$  = 12.0 Hz, H-3'a).  $^{13}\text{C}$  NMR ( $\text{D}_2\text{O}$ , 100 MHz):  $\delta$  203.9, 176.8, 175.0, 174.2, 141.6, 137.4, 135.7, 129.8, 129.4, 115.9, 103.0, 102.6, 78.6, 74.6, 73.1, 72.1, 69.7, 68.9, 68.5, 68.4, 67.8, 62.9, 61.3, 60.4, 52.1, 42.9, 40.1, 39.5, 35.3, 29.7, 26.6. HR ESI MS ( $m/z$ ) Calcd. for  $\text{C}_{38}\text{H}_{55}\text{N}_2\text{O}_{21}$  [ $\text{M} - \text{H}$ ] $^+$ : 875.3297; Found: 875.3315.

***N*-{2-*O*-[5-(*p*-Chlorophenylacetamido)-3,5-dideoxy-*D*-glycero- $\alpha$ -*D*-galacto-2-nonulopyranosylonic acid]-(2 $\rightarrow$ 3)- $\beta$ -*D*-galactopyranosyl-(1 $\rightarrow$ 4)-*D*-glucopyranosyl}-ethyl} 4-Pentenamide (7e).**  $^1\text{H}$  NMR ( $\text{D}_2\text{O}$ , 400 MHz):  $\delta$  7.29 (d, 2H,  $J$  = 8.8 Hz, aromatic H), 7.01 (d, 2H,  $J$  = 9.2 Hz, aromatic H), 5.92-5.83 (m, 1H,  $\text{CH}=\text{CH}_2$ ), 5.12-5.04 (m, 2H,  $\text{CH}=\text{CH}_2$ ), 4.53-4.48 (m, 2H), 4.12-4.09 (m, 1H), 4.01-3.94 (m, 3H), 3.87-3.31 (m, 21H), 2.77 (dd, 1H,  $J$  = 12.0, 4.8 Hz, H-3''e), 2.37-2.35 (m, 4H,  $\text{COCH}_2\text{CH}_2\text{CH}=\text{CH}_2$ ), 1.80 (t, 1H,  $J$  = 12.0 Hz, H-3'a).  $^{13}\text{C}$  NMR ( $\text{D}_2\text{O}$ , 100 MHz):  $\delta$  176.7, 175.5, 174.2, 137.3, 133.9, 132.8, 130.9, 129.1, 115.9, 102.9, 102.5, 100.1, 78.5, 74.6, 73.1, 72.1, 69.6, 68.9, 68.5, 68.4, 67.7, 62.9, 61.3, 60.3, 52.0, 42.2, 40.1, 39.5, 35.3, 29.6. HR ESI MS ( $m/z$ ) Calcd. for  $\text{C}_{36}\text{H}_{52}\text{ClN}_2\text{O}_{20}$  [ $\text{M} - \text{H}$ ] $^+$ : 867.2802; Found: 867.2805.

**General procedure for the synthesis of compounds 8b-e.** To a stirred solutions of **7b-e** (18 mg) in MeOH (5 mL) at -78  $^\circ\text{C}$ , ozone was bubbled until a blue color appeared and remained at -78  $^\circ\text{C}$  for 0.5 h. After introducing nitrogen to remove the remaining ozone,  $\text{Me}_2\text{S}$  (0.5 mL) was added at -78  $^\circ\text{C}$ .

The resultant solutions were allowed to warm to rt over a period of 1 h and stand for another 1 h before they were condensed in vacuum. The crude products were purified by a Biogel P-2 column using distilled water as the eluent to give aldehydes **8b-e** after lyophilization as white solids, which were used in the following conjugation reactions without further purification.

***N*-{2-*O*-[3,5-Dideoxy-5-(*p*-methylphenylacetamido)-*D*-glycero- $\alpha$ -*D*-galacto-2-nonulopyranosylonic acid]-(2 $\rightarrow$ 3)- $\beta$ -*D*-galactopyranosyl-(1 $\rightarrow$ 4)-*D*-glucopyranosyl}-ethyl} 4-Oxo-butanamide (8b).**  $^1\text{H}$  NMR ( $\text{D}_2\text{O}$ , 400 MHz):  $\delta$  8.46 (bs, 1H, -CHO), 7.24-7.22 (m, 4H, aromatic H), 4.50-4.42 (m, 2H), 4.11-4.06 (m, 1H), 3.95-3.86 (m, 2H), 3.76-3.50 (m, 16H), 3.38-3.33 (m, 2H), 2.75 (dd, 1H,  $J = 12.0, 4.8$  Hz, H-3''e), 2.46-2.40 (m, 4H,  $\text{COCH}_2\text{CH}_2\text{CHO}$ ), 2.33 (s, 3H,  $\text{PhCH}_3$ ), 1.79 (t,  $J = 12.0$  Hz, 1H, H-3'a). HR ESI MS ( $m/z$ ) Calcd. for  $\text{C}_{36}\text{H}_{53}\text{N}_2\text{O}_{21}$   $[\text{M} - \text{H}]^+$ : 849.3141; Found: 849.3170.

***N*-{2-*O*-[3,5-Dideoxy-5-(*p*-methoxyphenylacetamido)-*D*-glycero- $\alpha$ -*D*-galacto-2-nonulopyranosylonic acid]-(2 $\rightarrow$ 3)- $\beta$ -*D*-galactopyranosyl-(1 $\rightarrow$ 4)-*D*-glucopyranosyl}-ethyl} 4-Oxo-butanamide (8c).**  $^1\text{H}$  NMR ( $\text{D}_2\text{O}$ , 500 MHz):  $\delta$  8.39 (s, 1H, -CHO), 7.18 (d,  $J = 6.8$  Hz, 2H, aromatic H), 6.90 (d, 2H,  $J = 6.8$  Hz, aromatic H), 4.44-4.37 (m, 3H), 4.02-3.84 (m, 7H), 3.73 (s, 3H,  $\text{OCH}_3$ ), 3.71-3.38 (m, 33H), 2.65 (dd, 1H,  $J = 10.0, 3.6$  Hz, H-3''e), 2.52-2.30 (m, 4H,  $\text{COCH}_2\text{CH}_2\text{CHO}$ ), 1.68 (t,  $J = 9.2$  Hz, 1H, H-3'a). HR ESI MS ( $m/z$ ) Calcd. for  $\text{C}_{36}\text{H}_{53}\text{N}_2\text{O}_{22}$   $[\text{M} - \text{H}]^+$ : 865.3090; Found: 865.3101.

***N*-{2-*O*-[5-(*p*-Acetophenylacetamido)-3,5-Dideoxy-*D*-glycero- $\alpha$ -*D*-galacto-2-nonulopyranosylonic acid]-(2 $\rightarrow$ 3)- $\beta$ -*D*-galactopyranosyl-(1 $\rightarrow$ 4)-*D*-glucopyranosyl}-ethyl} 4-Oxo-butanamide (8d).**  $^1\text{H}$  NMR ( $\text{D}_2\text{O}$ , 500 MHz):  $\delta$  8.35 (s, 1H, -CHO), 7.89 (d, 2H,  $J = 6.4$  Hz, aromatic H), 7.37 (d, 2H,  $J = 6.8$  Hz, aromatic H), 4.42-4.38 (m, 2H), 4.01-3.99 (m, 1H), 3.89-3.85 (m, 3H), 3.77-3.21 (m, 23H), 2.66 (dd, 1H,  $J = 12.0, 4.5$  Hz, H-3''e), 2.57 (s, 3H,  $\text{COCH}_3$ ), 2.38-2.35 (m, 4H,  $\text{COCH}_2\text{CH}_2\text{CHO}$ ), 1.69 (t, 1H,  $J = 12.0$  Hz, H-3'a). MALDI-TOF MS ( $m/z$ ) Calcd. for  $\text{C}_{37}\text{H}_{54}\text{N}_2\text{NaO}_{22}$   $[\text{M} + \text{Na}]^+$ : 901.3; Found: 901.3.

***N*-{2-*O*-[5-(*p*-Chlorophenylacetamido)-3,5-Dideoxy-*D*-glycero- $\alpha$ -*D*-galacto-2-nonulopyranosylonic acid]-(2 $\rightarrow$ 3)- $\beta$ -*D*-galactopyranosyl-(1 $\rightarrow$ 4)-*D*-glucopyranosyl}-ethyl} 4-Oxo-butanamide (8e).**  $^1\text{H}$  NMR ( $\text{D}_2\text{O}$ , 400 MHz):  $\delta$  8.45 (bs, 1H, -CHO), 7.41 (d, 2H,  $J = 8.0$  Hz, aromatic H), 7.30 (d, 2H,  $J = 8.8$  Hz, aromatic H), 4.70-4.47 (m, 2H), 4.01-3.99 (m, 1H), 3.89-3.85 (m, 3H), 3.77-3.21 (m, 23H), 3.96-3.52 (m, 21H), 3.35-3.33 (m, 2H), 2.76 (dd, 1H,  $J = 12.4, 4.8$  Hz, H-

3''e), 2.47-2.40 (m, 4H, COCH<sub>2</sub>CH<sub>2</sub>CHO), 1.79 (t, 1H, *J* = 12.0 Hz, H-3'a). HR ESI MS (*m/z*) Calcd. for C<sub>36</sub>H<sub>50</sub>ClN<sub>2</sub>O<sub>21</sub> [*M* – H]<sup>+</sup>: 869.2595; Found: 869.2624.

**Procedure for the coupling between 8b-e and KLH or HSA.** The solutions of **8b-e** (7 mg), KLH or HSA (7 mg), and NaBH<sub>3</sub>CN (7 mg) in 0.1 M aq. NaHCO<sub>3</sub> (0.1 mL, pH 7.5-8.0) were allowed to stand at rt in the dark for 4 days with occasional shaking. The reaction mixtures were then purified by a Biogel A 0.5 column using 0.1 M phosphate buffered saline (PBS) buffer (*I* = 0.1, pH = 7.8) as the eluent. The fractions containing the glycoconjugates, characterized by bicinchoninic acid (BCA) assay for proteins, were combined and dialyzed against distilled water for 2 days. They were lyophilized to give a white powder of the expected glycoconjugates **1b-e** and **2b-e** (~ 6-7 mg).

**Analysis of the carbohydrate loading levels of the glycoconjugates 1b-e and 2b-e.**<sup>2</sup> The solution of an exactly weighed glycoconjugate (0.35-0.6 mg) in distilled water (1.0 mL) was mixed with the resorcinol reagent (2.0 mL) and the mixture was heated in a boiling water bath for 30 min. After it was cooled to rt, was added an extraction solution (1-butanol acetate and 1-butanol, 85:15 v/v, 3.0 mL). The mixture was shaken vigorously before it was allowed to stand still for ca. 10 min to allow the organic layer to separate well from the inorganic layer. The organic layer was transferred to a 1.0-cm cuvette, and its absorbance at 580 nm was determined by an UV-Vis spectrometer, using a blank extraction solution as the control. The sialic acid content of the glycoconjugates was determined against a calibration curve created with the solution of an individual standard NeuNPhAc derivative analyzed under the same condition. The carbohydrate loading of each glycoconjugate was calculated according to the following equation.

$$\text{Derivatized GM3PhAc loading (\%)} = \frac{\text{derivatized GM3NPhAc content (mg) in the sample}}{\text{weight of the glycoconjugate sample (mg)}} \times 100\%$$

**Immunization of Mouse.** A total of 0.1 mL of the emulsion of **1a-e** (containing 3 µg of carbohydrate antigen) and Titermax Gold adjuvant (Sigma Chemical, St. Louis, MO) were intramuscularly injected to each group of five female C57BL/6 mice at the age of 6-8 weeks (Jackson Laboratories, Bar Harbor, ME) on day 0, 14, 21 and 28, respectively. The mice were bled prior to the initial immunization on day -1 and after immunization on day 27 and day 37. Blood samples collected at each time point were clotted to obtain antisera and stored at -80 °C before assays.

**Enzyme-Linked Immunosorbent Assay (ELISA).** ELISA plates were treated respectively with 100 µL solution of conjugates **2a-e** and GM3-HSA (2 µg/mL) in the coating buffer (0.1 M bicarbonate, pH



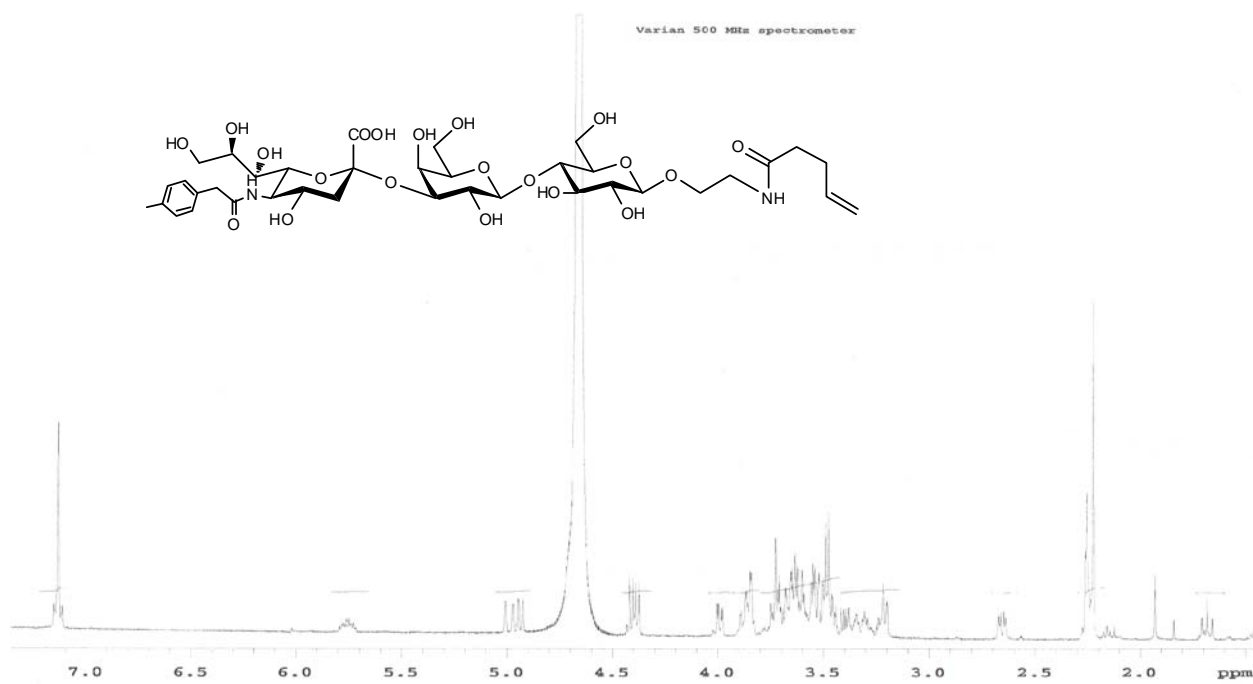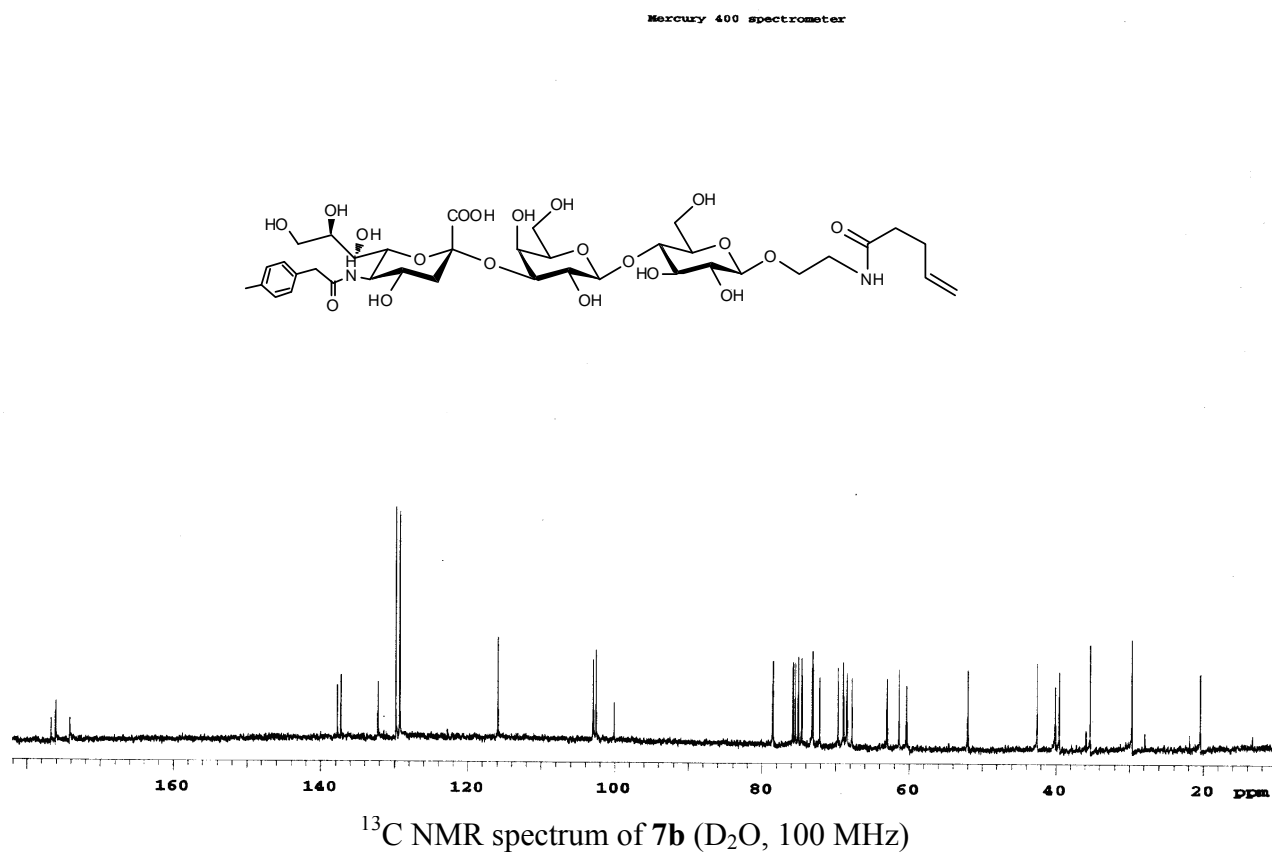

# Elemental Composition Report

## Single Mass Analysis

Tolerance = 5.0 PPM / DBE: min = 0.0, max = 100.0  
Element prediction: Off  
Number of isotope peaks used for i-FIT = 3

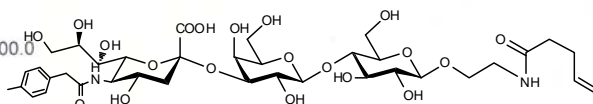

Monoisotopic Mass, Even Electron Ions

1815 formula(e) evaluated with 12 results within limits (all results (up to 1000) for each mass)

Elements Used:

C: 0-100 H: 0-200 N: 0-4 O: 0-20 Na: 0-1

SHI CHONG YU

YUSCC 0143

Lew 2008-07b.pro

2009\_0921\_0596 17 (0.334) Cm (14:21-(3:9+38:47))

LCT Premier 21-Sep-2009 11:11:57

1: TOF MS ES-

5.50e+002

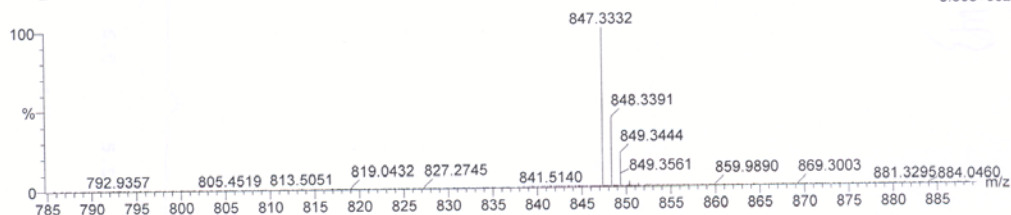

Minimum: 0.0  
Maximum: 100.0

| Mass     | Calc. Mass | mDa  | PPM  | DBE   | i-FIT | i-FIT (Norm) | Formula          |
|----------|------------|------|------|-------|-------|--------------|------------------|
| 847.3332 | 847.3324   | 0.8  | 0.9  | 8.5   | 100.3 | 2.5          | C35 H56 N2 O20   |
|          |            |      |      |       |       |              | Na               |
| 847.3348 | -1.6       | -1.9 | 11.5 | 99.2  | 1.5   |              | C37 H55 N2 O20   |
| 847.3364 | -3.2       | -3.8 | 12.5 | 99.4  | 1.6   |              | C40 H56 O18 Na   |
| 847.3306 | 2.6        | 3.1  | 21.5 | 100.9 | 3.2   |              | C47 H52 O13 Na   |
| 847.3319 | 1.3        | 1.5  | 26.5 | 100.6 | 2.8   |              | C48 H48 N4 O9 Na |
| 847.3330 | 0.2        | 0.2  | 24.5 | 99.7  | 1.9   |              | C49 H51 O13      |
| 847.3343 | -1.1       | -1.3 | 29.5 | 99.9  | 2.1   |              | C50 H47 N4 O9    |
| 847.3359 | -2.7       | -3.2 | 30.5 | 100.3 | 2.6   |              | C53 H48 N2 O7 Na |
| 847.3300 | 3.2        | 3.8  | 39.5 | 103.1 | 5.4   |              | C60 H44 N2 O2 Na |
| 847.3325 | 0.7        | 0.8  | 42.5 | 101.8 | 4.1   |              | C62 H43 N2 O2    |
| 847.3341 | -0.9       | -1.1 | 43.5 | 101.5 | 3.7   |              | C65 H44 Na       |
| 847.3365 | -3.3       | -3.9 | 46.5 | 102.2 | 4.4   |              | C67 H43          |

HR ESI MS spectrum of 7b

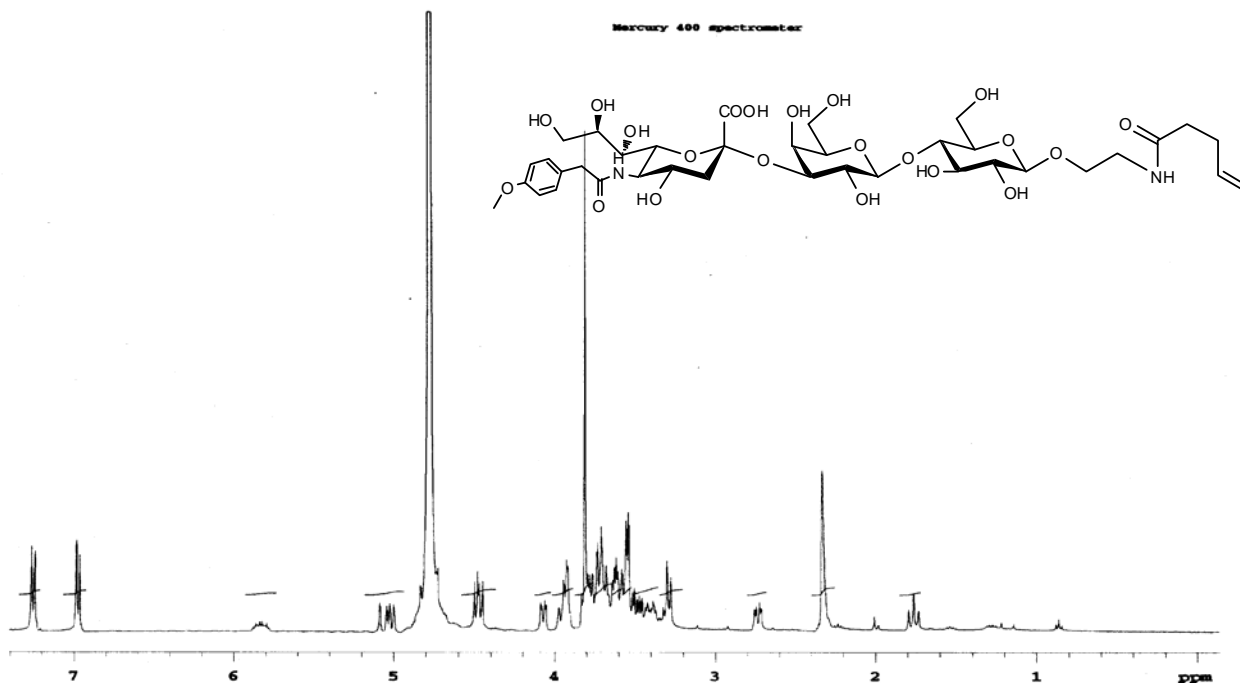

<sup>1</sup>H NMR spectrum of 7c (D<sub>2</sub>O, 400 MHz)

Mercury 400 spectrometer

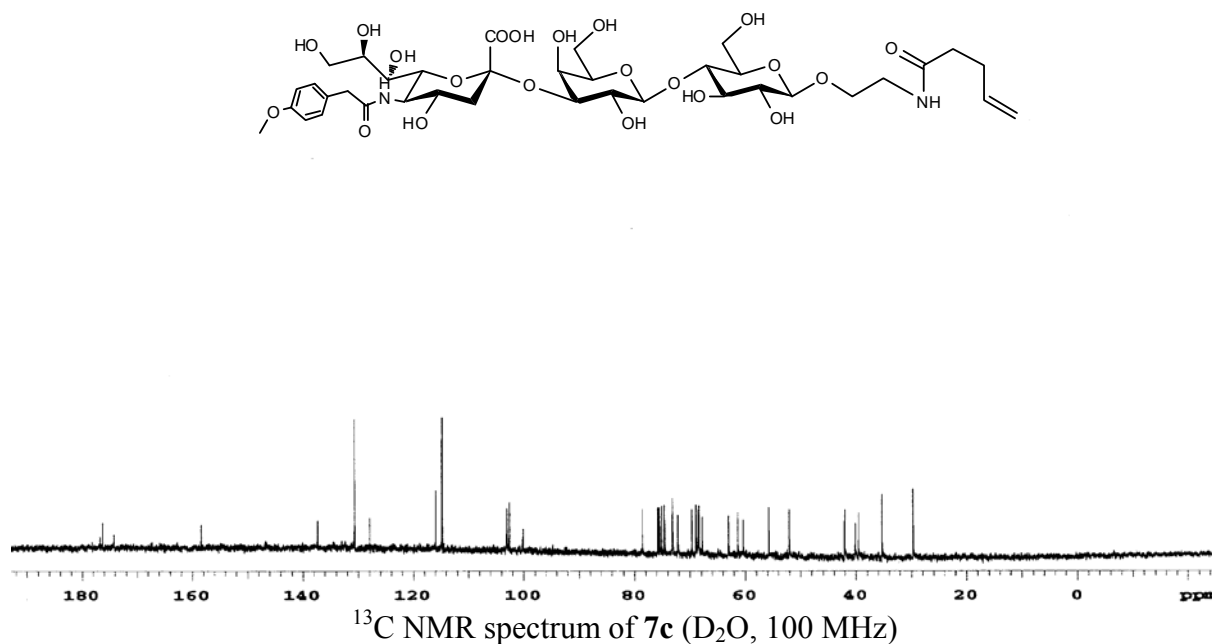

# Elemental Composition Report

## Single Mass Analysis

Tolerance = 5.0 PPM / DBE: min = 0.0, max = 100.0  
Element prediction: Off  
Number of isotope peaks used for i-FIT = 3

Monoisotopic Mass, Even Electron Ions  
1988 formula(e) evaluated with 12 results within limits (all results (up to 1000) for each mass)  
Elements Used:  
C: 0-100 H: 0-200 N: 0-4 O: 0-22 Na: 0-1  
SHICHONG YU YUSCC 0142  
Lew 2008-07b.pro  
2009\_0921\_0598a 15 (0.301) Cm (13:19-(3:9+37:43))

LCT Premier 21-Sep-2009 11:49:59  
1: TOF MS ES-  
1.03e+003

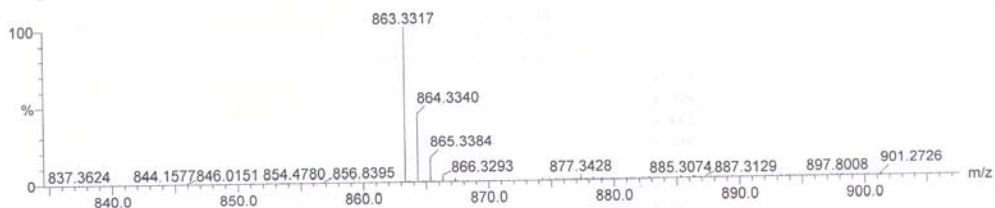

|          |  |  |  |     |  |  |  |  |  |  |  |  |  |  |  |  |  |  |  |  |  |  |  |  |  |  |  |  |  |  |  |  |  |  |  |  |  |  |  |  |  |  |  |  |  |  |  |  |  |  |  |  |  |  |  |  |  |  |  |  |  |  |  |  |  |  |  |  |  |  |  |  |  |  |  |  |  |  |  |  |  |  |  |  |  |  |  |  |  |  |  |  |  |  |  |  |  |  |  |  |  |  |  |  |  |  |  |  |  |  |  |  |  |  |  |  |  |  |  |  |  |  |  |  |  |  |  |  |  |  |  |  |  |  |  |  |  |  |  |  |  |  |  |  |  |  |  |  |  |  |  |  |  |  |  |  |  |  |  |  |  |  |  |  |  |  |  |  |  |  |  |  |  |  |  |  |  |  |  |  |  |  |  |  |  |  |  |  |  |  |  |  |  |  |  |  |  |  |  |  |  |  |  |  |  |  |  |  |  |  |  |  |  |  |  |  |  |  |  |  |  |  |  |  |  |  |  |  |  |  |  |  |  |  |  |  |  |  |  |  |  |  |  |  |  |  |  |  |  |  |  |  |  |  |  |  |  |  |  |  |  |  |  |  |  |  |  |  |  |  |  |  |  |  |  |  |  |  |  |  |  |  |  |  |  |  |  |  |  |  |  |  |  |  |  |  |  |  |  |  |  |  |  |  |  |  |  |  |  |  |  |  |  |  |  |  |  |  |  |  |  |  |  |  |  |  |  |  |  |  |  |  |  |  |  |  |  |  |  |  |  |  |  |  |  |  |  |  |  |  |  |  |  |  |  |  |  |  |  |  |  |  |  |  |  |  |  |  |  |  |  |  |  |  |  |  |  |  |  |  |  |  |  |  |  |  |  |  |  |  |  |  |  |  |  |  |  |  |  |  |  |  |  |  |  |  |  |  |  |  |  |  |  |  |  |  |  |  |  |  |  |  |  |  |  |  |  |  |  |  |  |  |  |  |  |  |  |  |  |  |  |  |  |  |  |  |  |  |  |  |  |  |  |  |  |  |  |  |  |  |  |  |  |  |  |  |  |  |  |  |  |  |  |  |  |  |  |  |  |  |  |  |  |  |  |  |  |  |  |  |  |  |  |  |  |  |  |  |  |  |  |  |  |  |  |  |  |  |  |  |  |  |  |  |  |  |  |  |  |  |  |  |  |  |  |  |  |  |  |  |  |  |  |  |  |  |  |  |  |  |  |  |  |  |  |  |  |  |  |  |  |  |  |  |  |  |  |  |  |  |  |  |  |  |  |  |  |  |  |  |  |  |  |  |  |  |  |  |  |  |  |  |  |  |  |  |  |  |  |  |  |  |  |  |  |  |  |  |  |  |  |  |  |  |  |  |  |  |  |  |  |  |  |  |  |  |  |  |  |  |  |  |  |  |  |  |  |  |  |  |  |  |  |  |  |  |  |  |  |  |  |  |  |  |  |  |  |  |  |  |  |  |  |  |  |  |  |  |  |  |  |  |  |  |  |  |  |  |  |  |  |  |  |  |  |  |  |  |  |  |  |  |  |  |  |  |  |  |  |  |  |  |  |  |  |  |  |  |  |  |  |  |  |  |  |  |  |  |  |  |  |  |  |  |  |  |  |  |  |  |  |  |  |  |  |  |  |  |  |  |  |  |  |  |  |  |  |  |  |  |  |  |  |  |  |  |  |  |  |  |  |  |  |  |  |  |  |  |  |  |  |  |  |  |  |  |  |  |  |  |  |  |  |  |  |  |  |  |  |  |  |  |  |  |  |  |  |  |  |  |  |  |  |  |  |  |  |  |  |  |  |  |  |  |  |  |  |  |  |  |  |  |  |  |  |  |  |  |  |  |  |  |  |  |  |  |  |  |  |  |  |  |  |  |  |  |  |  |  |  |  |  |  |  |  |  |  |  |  |  |  |  |  |  |  |  |  |  |  |  |  |  |  |  |  |  |  |  |  |  |  |  |  |  |  |  |  |  |  |  |  |  |  |  |  |  |  |  |  |  |  |  |  |  |  |  |  |  |  |  |  |  |  |  |  |  |  |  |  |  |  |  |  |  |  |  |  |  |  |  |  |  |  |  |  |  |  |  |  |  |  |  |  |  |  |  |  |  |  |  |  |  |  |  |  |  |  |  |  |  |  |  |  |  |  |  |  |  |  |  |  |  |  |  |  |  |  |  |  |  |  |  |  |  |  |  |  |  |  |  |  |  |  |  |  |  |  |  |  |  |  |  |  |  |  |  |  |  |  |  |  |  |  |  |  |  |  |  |  |  |  |  |  |  |  |  |  |  |  |  |  |  |  |  |  |  |  |  |  |  |  |  |  |  |  |  |  |  |  |  |  |  |  |  |  |  |  |  |  |  |  |  |  |  |  |  |  |  |  |  |  |  |  |  |  |  |  |  |  |  |  |  |  |  |  |  |  |  |  |  |  |  |  |  |  |  |  |  |  |  |  |  |  |  |  |  |  |  |  |  |  |  |  |  |  |  |  |  |  |  |  |  |  |  |  |  |  |  |  |  |  |  |  |  |  |  |  |  |  |  |  |  |  |  |  |  |  |  |  |  |  |  |  |  |  |  |  |  |  |  |  |  |  |  |  |  |  |  |  |  |  |  |  |  |  |  |  |  |  |  |  |  |  |  |  |  |  |  |  |  |  |  |  |  |  |  |  |  |  |  |  |  |  |  |  |  |  |  |  |  |  |  |  |  |  |  |  |  |  |  |  |  |  |  |  |  |  |  |  |  |  |  |  |  |  |  |  |  |  |  |  |  |  |  |  |  |  |  |  |  |  |  |  |  |  |  |  |  |  |  |  |  |  |  |  |  |  |  |  |  |  |  |  |  |  |  |  |  |  |  |  |  |  |  |  |  |  |  |  |  |  |  |  |  |  |  |  |  |  |  |  |  |  |  |  |  |  |  |  |  |  |  |  |  |  |  |  |  |  |  |  |  |  |  |  |  |  |  |  |  |  |  |  |  |  |  |  |  |  |  |  |  |  |  |  |  |  |  |  |  |  |  |  |  |  |  |  |  |  |  |  |  |  |  |  |  |  |  |  |  |  |  |  |  |  |  |  |  |  |  |  |  |  |  |  |  |  |  |  |  |  |  |  |  |  |  |  |  |  |  |  |  |  |  |  |  |  |  |  |  |  |  |  |  |  |  |  |  |  |  |  |  |  |  |  |  |  |  |  |  |  |  |  |  |  |  |  |  |  |  |  |  |  |  |  |  |  |  |  |  |  |  |  |  |  |  |  |  |  |  |  |  |  |  |  |  |  |  |  |  |  |  |  |  |  |  |  |  |  |  |  |  |  |  |  |  |  |  |  |  |  |  |  |  |  |  |  |  |  |  |  |  |  |  |    |
|----------|--|--|--|-----|--|--|--|--|--|--|--|--|--|--|--|--|--|--|--|--|--|--|--|--|--|--|--|--|--|--|--|--|--|--|--|--|--|--|--|--|--|--|--|--|--|--|--|--|--|--|--|--|--|--|--|--|--|--|--|--|--|--|--|--|--|--|--|--|--|--|--|--|--|--|--|--|--|--|--|--|--|--|--|--|--|--|--|--|--|--|--|--|--|--|--|--|--|--|--|--|--|--|--|--|--|--|--|--|--|--|--|--|--|--|--|--|--|--|--|--|--|--|--|--|--|--|--|--|--|--|--|--|--|--|--|--|--|--|--|--|--|--|--|--|--|--|--|--|--|--|--|--|--|--|--|--|--|--|--|--|--|--|--|--|--|--|--|--|--|--|--|--|--|--|--|--|--|--|--|--|--|--|--|--|--|--|--|--|--|--|--|--|--|--|--|--|--|--|--|--|--|--|--|--|--|--|--|--|--|--|--|--|--|--|--|--|--|--|--|--|--|--|--|--|--|--|--|--|--|--|--|--|--|--|--|--|--|--|--|--|--|--|--|--|--|--|--|--|--|--|--|--|--|--|--|--|--|--|--|--|--|--|--|--|--|--|--|--|--|--|--|--|--|--|--|--|--|--|--|--|--|--|--|--|--|--|--|--|--|--|--|--|--|--|--|--|--|--|--|--|--|--|--|--|--|--|--|--|--|--|--|--|--|--|--|--|--|--|--|--|--|--|--|--|--|--|--|--|--|--|--|--|--|--|--|--|--|--|--|--|--|--|--|--|--|--|--|--|--|--|--|--|--|--|--|--|--|--|--|--|--|--|--|--|--|--|--|--|--|--|--|--|--|--|--|--|--|--|--|--|--|--|--|--|--|--|--|--|--|--|--|--|--|--|--|--|--|--|--|--|--|--|--|--|--|--|--|--|--|--|--|--|--|--|--|--|--|--|--|--|--|--|--|--|--|--|--|--|--|--|--|--|--|--|--|--|--|--|--|--|--|--|--|--|--|--|--|--|--|--|--|--|--|--|--|--|--|--|--|--|--|--|--|--|--|--|--|--|--|--|--|--|--|--|--|--|--|--|--|--|--|--|--|--|--|--|--|--|--|--|--|--|--|--|--|--|--|--|--|--|--|--|--|--|--|--|--|--|--|--|--|--|--|--|--|--|--|--|--|--|--|--|--|--|--|--|--|--|--|--|--|--|--|--|--|--|--|--|--|--|--|--|--|--|--|--|--|--|--|--|--|--|--|--|--|--|--|--|--|--|--|--|--|--|--|--|--|--|--|--|--|--|--|--|--|--|--|--|--|--|--|--|--|--|--|--|--|--|--|--|--|--|--|--|--|--|--|--|--|--|--|--|--|--|--|--|--|--|--|--|--|--|--|--|--|--|--|--|--|--|--|--|--|--|--|--|--|--|--|--|--|--|--|--|--|--|--|--|--|--|--|--|--|--|--|--|--|--|--|--|--|--|--|--|--|--|--|--|--|--|--|--|--|--|--|--|--|--|--|--|--|--|--|--|--|--|--|--|--|--|--|--|--|--|--|--|--|--|--|--|--|--|--|--|--|--|--|--|--|--|--|--|--|--|--|--|--|--|--|--|--|--|--|--|--|--|--|--|--|--|--|--|--|--|--|--|--|--|--|--|--|--|--|--|--|--|--|--|--|--|--|--|--|--|--|--|--|--|--|--|--|--|--|--|--|--|--|--|--|--|--|--|--|--|--|--|--|--|--|--|--|--|--|--|--|--|--|--|--|--|--|--|--|--|--|--|--|--|--|--|--|--|--|--|--|--|--|--|--|--|--|--|--|--|--|--|--|--|--|--|--|--|--|--|--|--|--|--|--|--|--|--|--|--|--|--|--|--|--|--|--|--|--|--|--|--|--|--|--|--|--|--|--|--|--|--|--|--|--|--|--|--|--|--|--|--|--|--|--|--|--|--|--|--|--|--|--|--|--|--|--|--|--|--|--|--|--|--|--|--|--|--|--|--|--|--|--|--|--|--|--|--|--|--|--|--|--|--|--|--|--|--|--|--|--|--|--|--|--|--|--|--|--|--|--|--|--|--|--|--|--|--|--|--|--|--|--|--|--|--|--|--|--|--|--|--|--|--|--|--|--|--|--|--|--|--|--|--|--|--|--|--|--|--|--|--|--|--|--|--|--|--|--|--|--|--|--|--|--|--|--|--|--|--|--|--|--|--|--|--|--|--|--|--|--|--|--|--|--|--|--|--|--|--|--|--|--|--|--|--|--|--|--|--|--|--|--|--|--|--|--|--|--|--|--|--|--|--|--|--|--|--|--|--|--|--|--|--|--|--|--|--|--|--|--|--|--|--|--|--|--|--|--|--|--|--|--|--|--|--|--|--|--|--|--|--|--|--|--|--|--|--|--|--|--|--|--|--|--|--|--|--|--|--|--|--|--|--|--|--|--|--|--|--|--|--|--|--|--|--|--|--|--|--|--|--|--|--|--|--|--|--|--|--|--|--|--|--|--|--|--|--|--|--|--|--|--|--|--|--|--|--|--|--|--|--|--|--|--|--|--|--|--|--|--|--|--|--|--|--|--|--|--|--|--|--|--|--|--|--|--|--|--|--|--|--|--|--|--|--|--|--|--|--|--|--|--|--|--|--|--|--|--|--|--|--|--|--|--|--|--|--|--|--|--|--|--|--|--|--|--|--|--|--|--|--|--|--|--|--|--|--|--|--|--|--|--|--|--|--|--|--|--|--|--|--|--|--|--|--|--|--|--|--|--|--|--|--|--|--|--|--|--|--|--|--|--|--|--|--|--|--|--|--|--|--|--|--|--|--|--|--|--|--|--|--|--|--|--|--|--|--|--|--|--|--|--|--|--|--|--|--|--|--|--|--|--|--|--|--|--|--|--|--|--|--|--|--|--|--|--|--|--|--|--|--|--|--|--|--|--|--|--|--|--|--|--|--|--|--|--|--|--|--|--|--|--|--|--|--|--|--|--|--|--|--|--|--|--|--|--|--|--|--|--|--|--|--|--|--|--|--|--|--|--|--|--|--|--|--|--|--|--|--|--|--|--|--|--|--|--|--|--|--|--|--|--|--|--|--|--|--|--|--|--|--|--|--|--|--|--|--|--|--|--|--|--|--|--|--|--|--|--|--|--|--|--|--|--|--|--|--|--|--|--|--|--|--|--|--|--|--|--|--|--|--|--|--|--|--|--|--|--|--|--|--|--|--|--|--|--|--|--|--|--|--|--|--|--|--|--|--|--|--|--|--|--|--|--|--|--|--|--|--|--|--|--|--|--|--|--|--|--|--|--|--|--|--|--|--|--|--|--|--|--|--|--|--|--|--|--|--|--|--|--|--|--|--|--|--|--|--|--|--|----|
| Minimum: |  |  |  | 0.0 |  |  |  |  |  |  |  |  |  |  |  |  |  |  |  |  |  |  |  |  |  |  |  |  |  |  |  |  |  |  |  |  |  |  |  |  |  |  |  |  |  |  |  |  |  |  |  |  |  |  |  |  |  |  |  |  |  |  |  |  |  |  |  |  |  |  |  |  |  |  |  |  |  |  |  |  |  |  |  |  |  |  |  |  |  |  |  |  |  |  |  |  |  |  |  |  |  |  |  |  |  |  |  |  |  |  |  |  |  |  |  |  |  |  |  |  |  |  |  |  |  |  |  |  |  |  |  |  |  |  |  |  |  |  |  |  |  |  |  |  |  |  |  |  |  |  |  |  |  |  |  |  |  |  |  |  |  |  |  |  |  |  |  |  |  |  |  |  |  |  |  |  |  |  |  |  |  |  |  |  |  |  |  |  |  |  |  |  |  |  |  |  |  |  |  |  |  |  |  |  |  |  |  |  |  |  |  |  |  |  |  |  |  |  |  |  |  |  |  |  |  |  |  |  |  |  |  |  |  |  |  |  |  |  |  |  |  |  |  |  |  |  |  |  |  |  |  |  |  |  |  |  |  |  |  |  |  |  |  |  |  |  |  |  |  |  |  |  |  |  |  |  |  |  |  |  |  |  |  |  |  |  |  |  |  |  |  |  |  |  |  |  |  |  |  |  |  |  |  |  |  |  |  |  |  |  |  |  |  |  |  |  |  |  |  |  |  |  |  |  |  |  |  |  |  |  |  |  |  |  |  |  |  |  |  |  |  |  |  |  |  |  |  |  |  |  |  |  |  |  |  |  |  |  |  |  |  |  |  |  |  |  |  |  |  |  |  |  |  |  |  |  |  |  |  |  |  |  |  |  |  |  |  |  |  |  |  |  |  |  |  |  |  |  |  |  |  |  |  |  |  |  |  |  |  |  |  |  |  |  |  |  |  |  |  |  |  |  |  |  |  |  |  |  |  |  |  |  |  |  |  |  |  |  |  |  |  |  |  |  |  |  |  |  |  |  |  |  |  |  |  |  |  |  |  |  |  |  |  |  |  |  |  |  |  |  |  |  |  |  |  |  |  |  |  |  |  |  |  |  |  |  |  |  |  |  |  |  |  |  |  |  |  |  |  |  |  |  |  |  |  |  |  |  |  |  |  |  |  |  |  |  |  |  |  |  |  |  |  |  |  |  |  |  |  |  |  |  |  |  |  |  |  |  |  |  |  |  |  |  |  |  |  |  |  |  |  |  |  |  |  |  |  |  |  |  |  |  |  |  |  |  |  |  |  |  |  |  |  |  |  |  |  |  |  |  |  |  |  |  |  |  |  |  |  |  |  |  |  |  |  |  |  |  |  |  |  |  |  |  |  |  |  |  |  |  |  |  |  |  |  |  |  |  |  |  |  |  |  |  |  |  |  |  |  |  |  |  |  |  |  |  |  |  |  |  |  |  |  |  |  |  |  |  |  |  |  |  |  |  |  |  |  |  |  |  |  |  |  |  |  |  |  |  |  |  |  |  |  |  |  |  |  |  |  |  |  |  |  |  |  |  |  |  |  |  |  |  |  |  |  |  |  |  |  |  |  |  |  |  |  |  |  |  |  |  |  |  |  |  |  |  |  |  |  |  |  |  |  |  |  |  |  |  |  |  |  |  |  |  |  |  |  |  |  |  |  |  |  |  |  |  |  |  |  |  |  |  |  |  |  |  |  |  |  |  |  |  |  |  |  |  |  |  |  |  |  |  |  |  |  |  |  |  |  |  |  |  |  |  |  |  |  |  |  |  |  |  |  |  |  |  |  |  |  |  |  |  |  |  |  |  |  |  |  |  |  |  |  |  |  |  |  |  |  |  |  |  |  |  |  |  |  |  |  |  |  |  |  |  |  |  |  |  |  |  |  |  |  |  |  |  |  |  |  |  |  |  |  |  |  |  |  |  |  |  |  |  |  |  |  |  |  |  |  |  |  |  |  |  |  |  |  |  |  |  |  |  |  |  |  |  |  |  |  |  |  |  |  |  |  |  |  |  |  |  |  |  |  |  |  |  |  |  |  |  |  |  |  |  |  |  |  |  |  |  |  |  |  |  |  |  |  |  |  |  |  |  |  |  |  |  |  |  |  |  |  |  |  |  |  |  |  |  |  |  |  |  |  |  |  |  |  |  |  |  |  |  |  |  |  |  |  |  |  |  |  |  |  |  |  |  |  |  |  |  |  |  |  |  |  |  |  |  |  |  |  |  |  |  |  |  |  |  |  |  |  |  |  |  |  |  |  |  |  |  |  |  |  |  |  |  |  |  |  |  |  |  |  |  |  |  |  |  |  |  |  |  |  |  |  |  |  |  |  |  |  |  |  |  |  |  |  |  |  |  |  |  |  |  |  |  |  |  |  |  |  |  |  |  |  |  |  |  |  |  |  |  |  |  |  |  |  |  |  |  |  |  |  |  |  |  |  |  |  |  |  |  |  |  |  |  |  |  |  |  |  |  |  |  |  |  |  |  |  |  |  |  |  |  |  |  |  |  |  |  |  |  |  |  |  |  |  |  |  |  |  |  |  |  |  |  |  |  |  |  |  |  |  |  |  |  |  |  |  |  |  |  |  |  |  |  |  |  |  |  |  |  |  |  |  |  |  |  |  |  |  |  |  |  |  |  |  |  |  |  |  |  |  |  |  |  |  |  |  |  |  |  |  |  |  |  |  |  |  |  |  |  |  |  |  |  |  |  |  |  |  |  |  |  |  |  |  |  |  |  |  |  |  |  |  |  |  |  |  |  |  |  |  |  |  |  |  |  |  |  |  |  |  |  |  |  |  |  |  |  |  |  |  |  |  |  |  |  |  |  |  |  |  |  |  |  |  |  |  |  |  |  |  |  |  |  |  |  |  |  |  |  |  |  |  |  |  |  |  |  |  |  |  |  |  |  |  |  |  |  |  |  |  |  |  |  |  |  |  |  |  |  |  |  |  |  |  |  |  |  |  |  |  |  |  |  |  |  |  |  |  |  |  |  |  |  |  |  |  |  |  |  |  |  |  |  |  |  |  |  |  |  |  |  |  |  |  |  |  |  |  |  |  |  |  |  |  |  |  |  |  |  |  |  |  |  |  |  |  |  |  |  |  |  |  |  |  |  |  |  |  |  |  |  |  |  |  |  |  |  |  |  |  |  |  |  |  |  |  |  |  |  |  |  |  |  |  |  |  |  |  |  |  |  |  |  |  |  |  |  |  |  |  |  |  |  |  |  |  |  |  |  |  |  |  |  |  |  |  |  |  |  |  |  |  |  |  |  |  |  |  |  |  |  |  |  |  |  |  |  |  |  |  |  |  |  |  |  |  |  |  |  |  |  |  |  |  |  |  |  |  |  |  |  | </ |
|----------|--|--|--|-----|--|--|--|--|--|--|--|--|--|--|--|--|--|--|--|--|--|--|--|--|--|--|--|--|--|--|--|--|--|--|--|--|--|--|--|--|--|--|--|--|--|--|--|--|--|--|--|--|--|--|--|--|--|--|--|--|--|--|--|--|--|--|--|--|--|--|--|--|--|--|--|--|--|--|--|--|--|--|--|--|--|--|--|--|--|--|--|--|--|--|--|--|--|--|--|--|--|--|--|--|--|--|--|--|--|--|--|--|--|--|--|--|--|--|--|--|--|--|--|--|--|--|--|--|--|--|--|--|--|--|--|--|--|--|--|--|--|--|--|--|--|--|--|--|--|--|--|--|--|--|--|--|--|--|--|--|--|--|--|--|--|--|--|--|--|--|--|--|--|--|--|--|--|--|--|--|--|--|--|--|--|--|--|--|--|--|--|--|--|--|--|--|--|--|--|--|--|--|--|--|--|--|--|--|--|--|--|--|--|--|--|--|--|--|--|--|--|--|--|--|--|--|--|--|--|--|--|--|--|--|--|--|--|--|--|--|--|--|--|--|--|--|--|--|--|--|--|--|--|--|--|--|--|--|--|--|--|--|--|--|--|--|--|--|--|--|--|--|--|--|--|--|--|--|--|--|--|--|--|--|--|--|--|--|--|--|--|--|--|--|--|--|--|--|--|--|--|--|--|--|--|--|--|--|--|--|--|--|--|--|--|--|--|--|--|--|--|--|--|--|--|--|--|--|--|--|--|--|--|--|--|--|--|--|--|--|--|--|--|--|--|--|--|--|--|--|--|--|--|--|--|--|--|--|--|--|--|--|--|--|--|--|--|--|--|--|--|--|--|--|--|--|--|--|--|--|--|--|--|--|--|--|--|--|--|--|--|--|--|--|--|--|--|--|--|--|--|--|--|--|--|--|--|--|--|--|--|--|--|--|--|--|--|--|--|--|--|--|--|--|--|--|--|--|--|--|--|--|--|--|--|--|--|--|--|--|--|--|--|--|--|--|--|--|--|--|--|--|--|--|--|--|--|--|--|--|--|--|--|--|--|--|--|--|--|--|--|--|--|--|--|--|--|--|--|--|--|--|--|--|--|--|--|--|--|--|--|--|--|--|--|--|--|--|--|--|--|--|--|--|--|--|--|--|--|--|--|--|--|--|--|--|--|--|--|--|--|--|--|--|--|--|--|--|--|--|--|--|--|--|--|--|--|--|--|--|--|--|--|--|--|--|--|--|--|--|--|--|--|--|--|--|--|--|--|--|--|--|--|--|--|--|--|--|--|--|--|--|--|--|--|--|--|--|--|--|--|--|--|--|--|--|--|--|--|--|--|--|--|--|--|--|--|--|--|--|--|--|--|--|--|--|--|--|--|--|--|--|--|--|--|--|--|--|--|--|--|--|--|--|--|--|--|--|--|--|--|--|--|--|--|--|--|--|--|--|--|--|--|--|--|--|--|--|--|--|--|--|--|--|--|--|--|--|--|--|--|--|--|--|--|--|--|--|--|--|--|--|--|--|--|--|--|--|--|--|--|--|--|--|--|--|--|--|--|--|--|--|--|--|--|--|--|--|--|--|--|--|--|--|--|--|--|--|--|--|--|--|--|--|--|--|--|--|--|--|--|--|--|--|--|--|--|--|--|--|--|--|--|--|--|--|--|--|--|--|--|--|--|--|--|--|--|--|--|--|--|--|--|--|--|--|--|--|--|--|--|--|--|--|--|--|--|--|--|--|--|--|--|--|--|--|--|--|--|--|--|--|--|--|--|--|--|--|--|--|--|--|--|--|--|--|--|--|--|--|--|--|--|--|--|--|--|--|--|--|--|--|--|--|--|--|--|--|--|--|--|--|--|--|--|--|--|--|--|--|--|--|--|--|--|--|--|--|--|--|--|--|--|--|--|--|--|--|--|--|--|--|--|--|--|--|--|--|--|--|--|--|--|--|--|--|--|--|--|--|--|--|--|--|--|--|--|--|--|--|--|--|--|--|--|--|--|--|--|--|--|--|--|--|--|--|--|--|--|--|--|--|--|--|--|--|--|--|--|--|--|--|--|--|--|--|--|--|--|--|--|--|--|--|--|--|--|--|--|--|--|--|--|--|--|--|--|--|--|--|--|--|--|--|--|--|--|--|--|--|--|--|--|--|--|--|--|--|--|--|--|--|--|--|--|--|--|--|--|--|--|--|--|--|--|--|--|--|--|--|--|--|--|--|--|--|--|--|--|--|--|--|--|--|--|--|--|--|--|--|--|--|--|--|--|--|--|--|--|--|--|--|--|--|--|--|--|--|--|--|--|--|--|--|--|--|--|--|--|--|--|--|--|--|--|--|--|--|--|--|--|--|--|--|--|--|--|--|--|--|--|--|--|--|--|--|--|--|--|--|--|--|--|--|--|--|--|--|--|--|--|--|--|--|--|--|--|--|--|--|--|--|--|--|--|--|--|--|--|--|--|--|--|--|--|--|--|--|--|--|--|--|--|--|--|--|--|--|--|--|--|--|--|--|--|--|--|--|--|--|--|--|--|--|--|--|--|--|--|--|--|--|--|--|--|--|--|--|--|--|--|--|--|--|--|--|--|--|--|--|--|--|--|--|--|--|--|--|--|--|--|--|--|--|--|--|--|--|--|--|--|--|--|--|--|--|--|--|--|--|--|--|--|--|--|--|--|--|--|--|--|--|--|--|--|--|--|--|--|--|--|--|--|--|--|--|--|--|--|--|--|--|--|--|--|--|--|--|--|--|--|--|--|--|--|--|--|--|--|--|--|--|--|--|--|--|--|--|--|--|--|--|--|--|--|--|--|--|--|--|--|--|--|--|--|--|--|--|--|--|--|--|--|--|--|--|--|--|--|--|--|--|--|--|--|--|--|--|--|--|--|--|--|--|--|--|--|--|--|--|--|--|--|--|--|--|--|--|--|--|--|--|--|--|--|--|--|--|--|--|--|--|--|--|--|--|--|--|--|--|--|--|--|--|--|--|--|--|--|--|--|--|--|--|--|--|--|--|--|--|--|--|--|--|--|--|--|--|--|--|--|--|--|--|--|--|--|--|--|--|--|--|--|--|--|--|--|--|--|--|--|--|--|--|--|--|--|--|--|--|--|--|--|--|--|--|--|--|--|--|--|--|--|--|--|--|--|--|--|--|--|--|--|--|--|--|--|--|--|--|--|--|--|--|--|--|--|--|--|--|--|--|--|--|--|--|--|--|--|--|--|--|--|--|--|--|--|--|--|--|--|--|--|--|--|--|--|--|--|--|--|--|--|--|--|--|--|--|--|--|--|--|--|--|--|--|--|--|--|--|--|--|--|--|--|--|--|--|--|--|--|--|--|--|--|--|--|--|--|--|--|--|--|--|----|

HR ESI MS spectrum of **7c**

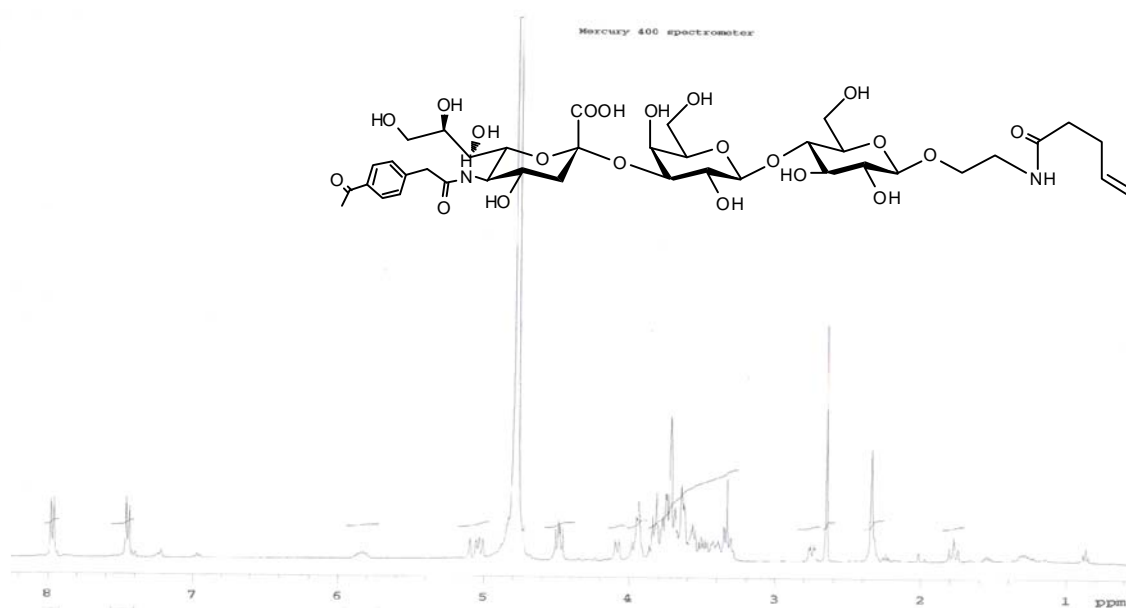

$^1\text{H}$  NMR spectrum of **7d** ( $\text{D}_2\text{O}$ , 400 MHz)

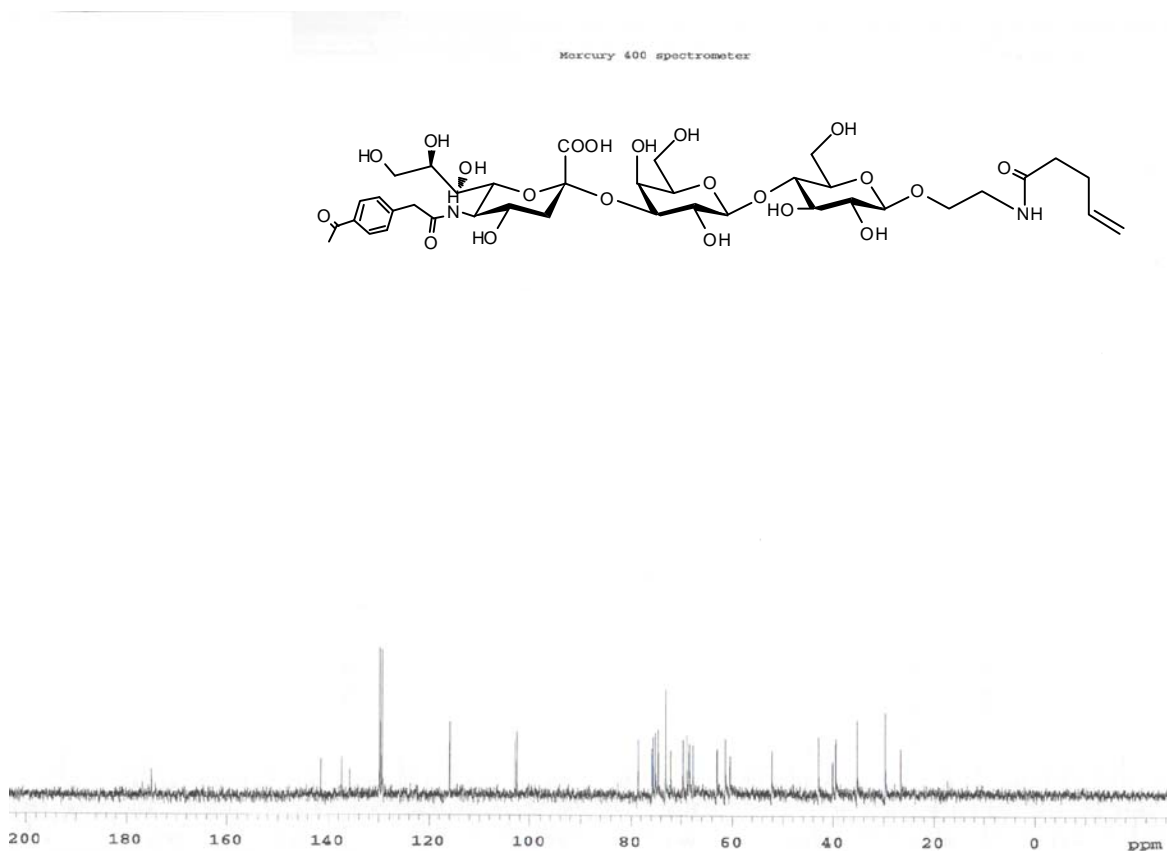

$^{13}\text{C}$  NMR spectrum of **7d** ( $\text{D}_2\text{O}$ , 100 MHz)

# Elemental Composition Report

## Single Mass Analysis

Tolerance = 5.0 PPM / DBE: min = 0.0, max = 100.0  
Element prediction: Off  
Number of isotope peaks used for i-FIT = 3

Monoisotopic Mass, Odd and Even Electron Ions

2021 formula(e) evaluated with 22 results within limits (all results (up to 1000) for each mass)

Elements Used:

C: 0-100 H: 0-200 N: 0-4 O: 0-22 Na: 0-1

SHICHONG YU

YUSCC 0147

Lew 2008-07b.pro

2009\_0921\_0597 14 (0.283) Cm (13:20-(3:9+39:47))

LCT Premier 21-Sep-2009 11:22:44  
1: TOF MS ES-  
1.91e+003

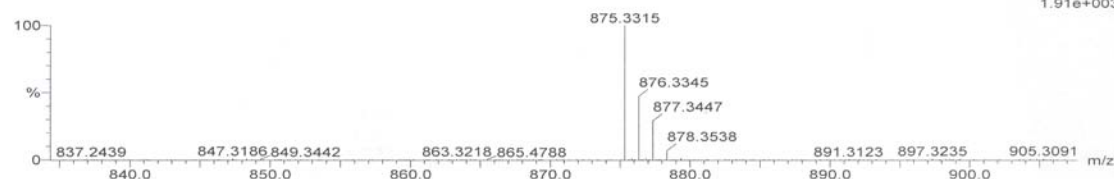

|          |            |      |      |      |       |              |         |     |        |
|----------|------------|------|------|------|-------|--------------|---------|-----|--------|
| Minimum: |            |      |      |      |       |              |         |     |        |
| Maximum: |            |      |      |      |       |              |         |     |        |
| Mass     | Calc. Mass | mDa  | PPM  | DBE  | i-FIT | i-FIT (Norm) | Formula |     |        |
| 875.3315 | 875.3273   | 4.2  | 4.8  | 9.5  | 135.8 | 4.5          | C36     | H56 | N2 O21 |
|          |            |      |      |      |       |              | Na      |     |        |
|          | 875.3297   | 1.8  | 2.1  | 12.5 | 134.9 | 3.6          | C38     | H55 | N2 O21 |
|          | 875.3300   | 1.5  | 1.7  | 14.0 | 134.8 | 3.5          | C39     | H54 | N3 O18 |
|          |            |      |      |      |       |              | Na      |     |        |
|          | 875.3324   | -0.9 | -1.0 | 17.0 | 134.2 | 2.9          | C41     | H53 | N3 O18 |
|          | 875.3314   | 0.1  | 0.1  | 13.5 | 134.3 | 2.9          | C41     | H56 | O19 Na |
|          | 875.3327   | -1.2 | -1.4 | 18.5 | 134.2 | 2.9          | C42     | H52 | N4 O15 |
|          |            |      |      |      |       |              | Na      |     |        |
|          | 875.3338   | -2.3 | -2.6 | 16.5 | 133.9 | 2.6          | C43     | H55 | O19    |

HR ESI MS spectrum of 7d

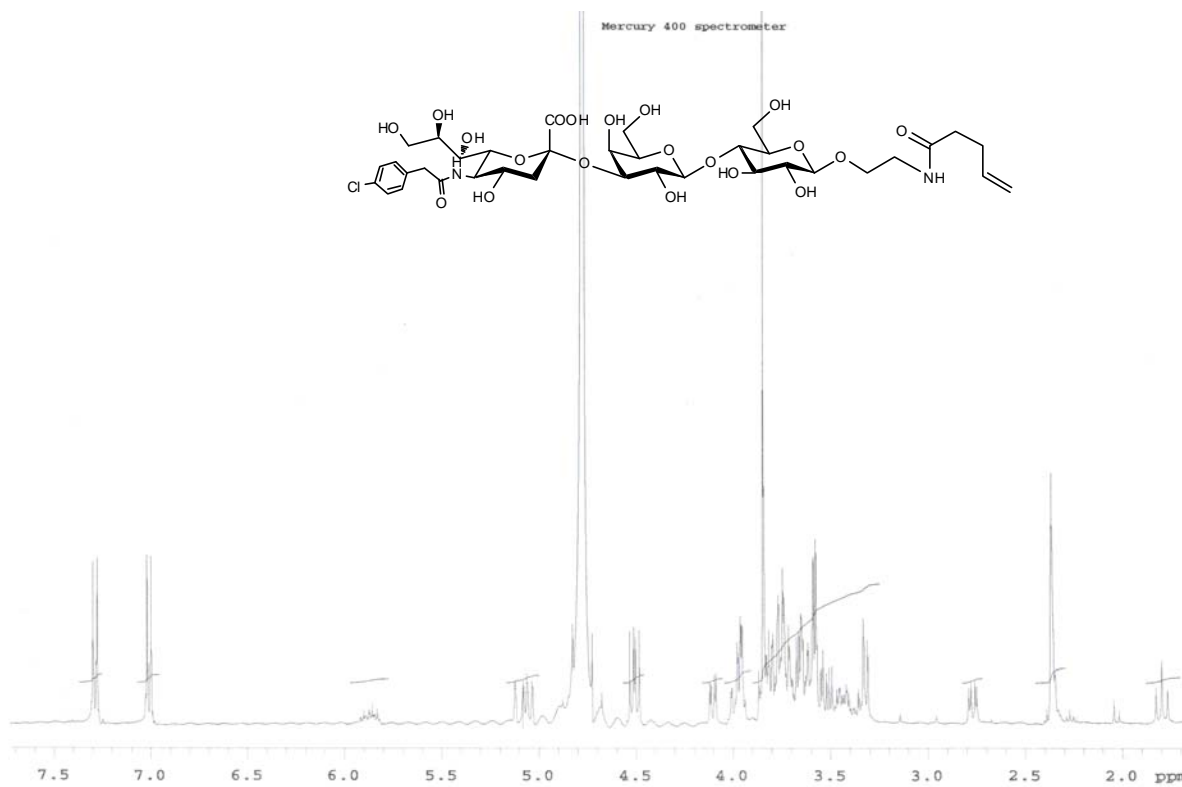

<sup>1</sup>H NMR spectrum of 7e (D<sub>2</sub>O, 400 MHz)

Mercury 400 spectrometer

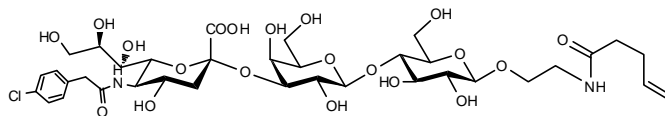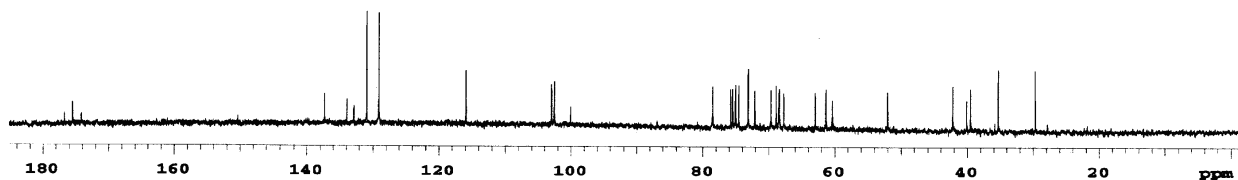

$^{13}\text{C}$  NMR spectrum of **7e** ( $\text{D}_2\text{O}$ , 100 MHz)

5646 formula(e) evaluated with 76 results within limits (all results (up to 1000) for each mass)

Elements Used:

C: 0-100 H: 0-200 N: 0-4 O: 0-22 Na: 0-1 Cl: 0-2

SHICHONG YU

YUSCC 0146

Lew 2008-07b.pro

2009\_0922\_0601 14 (0.283) Cm (13:17)

LCT Premier 22-Sep-2009 15:10:07

1: TOF MS ES-

7.06e+002

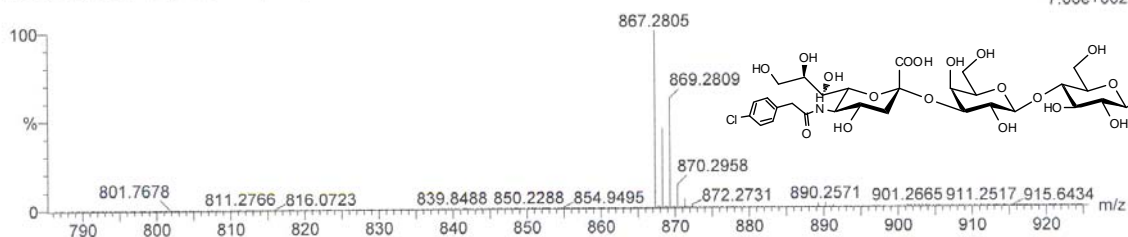

| Minimum: |            |      |      | 0.0   |       |              |         |              |
|----------|------------|------|------|-------|-------|--------------|---------|--------------|
| Maximum: |            | 5.0  | 10.0 | 100.0 |       |              |         |              |
| Mass     | Calc. Mass | mDa  | PPM  | DBE   | i-FIT | i-FIT (Norm) | Formula |              |
| 867.2805 | 867.2805   | 0.0  | 0.0  | 33.5  | 91.5  | 8.9          | C54     | H43 O11      |
|          | 867.2802   | 0.3  | 0.3  | 11.5  | 85.7  | 3.0          | C36     | H52 N2 O20   |
|          |            |      |      |       |       |              | Cl      |              |
|          | 867.2800   | 0.5  | 0.6  | 17.5  | 91.4  | 8.7          | C40     | H48 N2 O18   |
|          |            |      |      |       |       |              | Na      |              |
|          | 867.2800   | 0.5  | 0.6  | 51.5  | 91.5  | 8.9          | C67     | H35 N2       |
|          | 867.2810   | -0.5 | -0.6 | 8.5   | 85.6  | 2.9          | C34     | H54 N4 O16   |
|          |            |      |      |       |       |              | Na      | Cl2          |
|          | 867.2813   | -0.8 | -0.9 | 30.5  | 86.7  | 4.1          | C52     | H45 N2 O7 Na |
|          |            |      |      |       |       |              | Cl      |              |
|          | 867.2797   | 0.8  | 0.9  | 29.5  | 86.3  | 3.6          | C49     | H44 N4 O9 Cl |
|          | 867.2797   | 0.8  | 0.9  | 37.5  | 87.0  | 4.4          | C60     | H45 O2 Cl2   |
|          | 867.2796   | 0.9  | 1.0  | 3.5   | 86.1  | 3.4          | C33     | H58 O20 Na   |
|          |            |      |      |       |       |              | Cl2     |              |
|          | 867.2815   | -1.0 | -1.2 | 24.5  | 85.7  | 3.0          | C48     | H49 N2 O9    |
|          |            |      |      |       |       |              | Cl2     |              |

HR ESI MS spectrum of **7e**



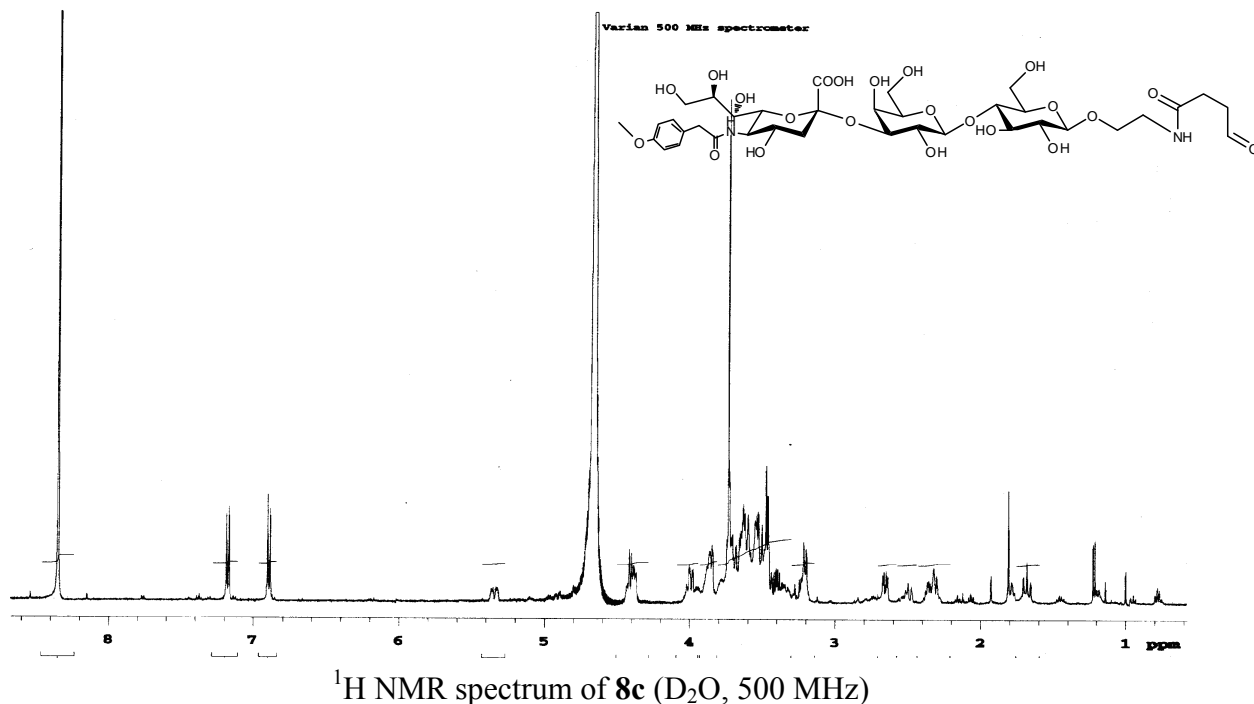

# Elemental Composition Report

Page 1

## Single Mass Analysis

Tolerance = 5.0 PPM / DBE: min = -1.5, max = 50.0  
Element prediction: Off  
Number of isotope peaks used for i-FIT = 3

Monoisotopic Mass, Even Electron Ions

1861 formula(e) evaluated with 14 results within limits (all results (up to 1000) for each mass)

Elements Used:

C: 0-50 H: 0-75 N: 0-5 O: 0-25 Na: 0-2

SHICHONG YU

YUSCC 0150

2008-07b.pro

2009\_0929\_0618a 14 (0.283) Cm (14:17-1:8)

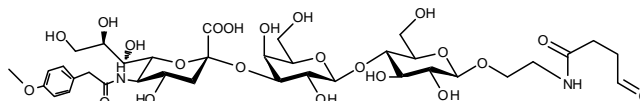

LCT Premier 29-Sep-2009 13:59:56

1: TOF MS ES-

2.18e+002

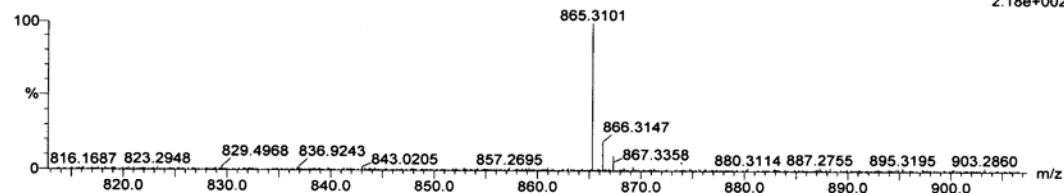

| Minimum: |            |      |      | -1.5 |       |              |         |     |         |
|----------|------------|------|------|------|-------|--------------|---------|-----|---------|
| Maximum: |            | 5.0  | 5.0  | 50.0 |       |              |         |     |         |
| Mass     | Calc. Mass | mDa  | PPM  | DBE  | i-FIT | i-FIT (Norm) | Formula |     |         |
| 865.3101 | 865.3106   | -0.5 | -0.6 | 12.5 | 73.9  | 2.1          | C39     | H54 | O20 Na  |
|          | 865.3095   | 0.6  | 0.7  | 14.5 | 74.1  | 2.3          | C38     | H51 | N4 O16  |
|          |            |      |      |      |       |              | Na2     |     |         |
|          | 865.3090   | 1.1  | 1.3  | 11.5 | 74.0  | 2.2          | C36     | H53 | N2 O22  |
|          | 865.3085   | 1.6  | 1.8  | 29.5 | 75.4  | 3.6          | C49     | H45 | N4 O11  |
|          | 865.3082   | 1.9  | 2.2  | 9.5  | 74.2  | 2.4          | C37     | H55 | O20 Na2 |
|          | 865.3120   | -1.9 | -2.2 | 17.5 | 74.3  | 2.5          | C40     | H50 | N4 O16  |
|          |            |      |      |      |       |              | Na      |     |         |
|          | 865.3077   | 2.4  | 2.8  | 27.5 | 75.7  | 3.9          | C50     | H47 | N2 O9   |
|          |            |      |      |      |       |              | Na2     |     |         |
|          | 865.3130   | -2.9 | -3.4 | 15.5 | 74.5  | 2.7          | C41     | H53 | O20     |
|          | 865.3071   | 3.0  | 3.5  | 24.5 | 75.8  | 4.0          | C48     | H49 | O15     |
|          | 865.3136   | -3.5 | -4.0 | 18.5 | 75.0  | 3.2          | C43     | H51 | N2 O14  |
|          |            |      |      |      |       |              | Na2     |     |         |
|          | 865.3066   | 3.5  | 4.0  | 8.5  | 74.7  | 2.9          | C34     | H54 | N2 O22  |
|          |            |      |      |      |       |              | Na      |     |         |
|          | 865.3061   | 4.0  | 4.6  | 26.5 | 76.4  | 4.6          | C47     | H46 | N4 O11  |
|          |            |      |      |      |       |              | Na      |     |         |
|          | 865.3141   | -4.0 | -4.6 | 0.5  | 73.2  | 1.5          | C30     | H59 | O25 Na2 |
|          | 865.3144   | -4.3 | -5.0 | 20.5 | 75.3  | 3.5          | C42     | H49 | N4 O16  |

HR ESI MS spectrum of **8c**

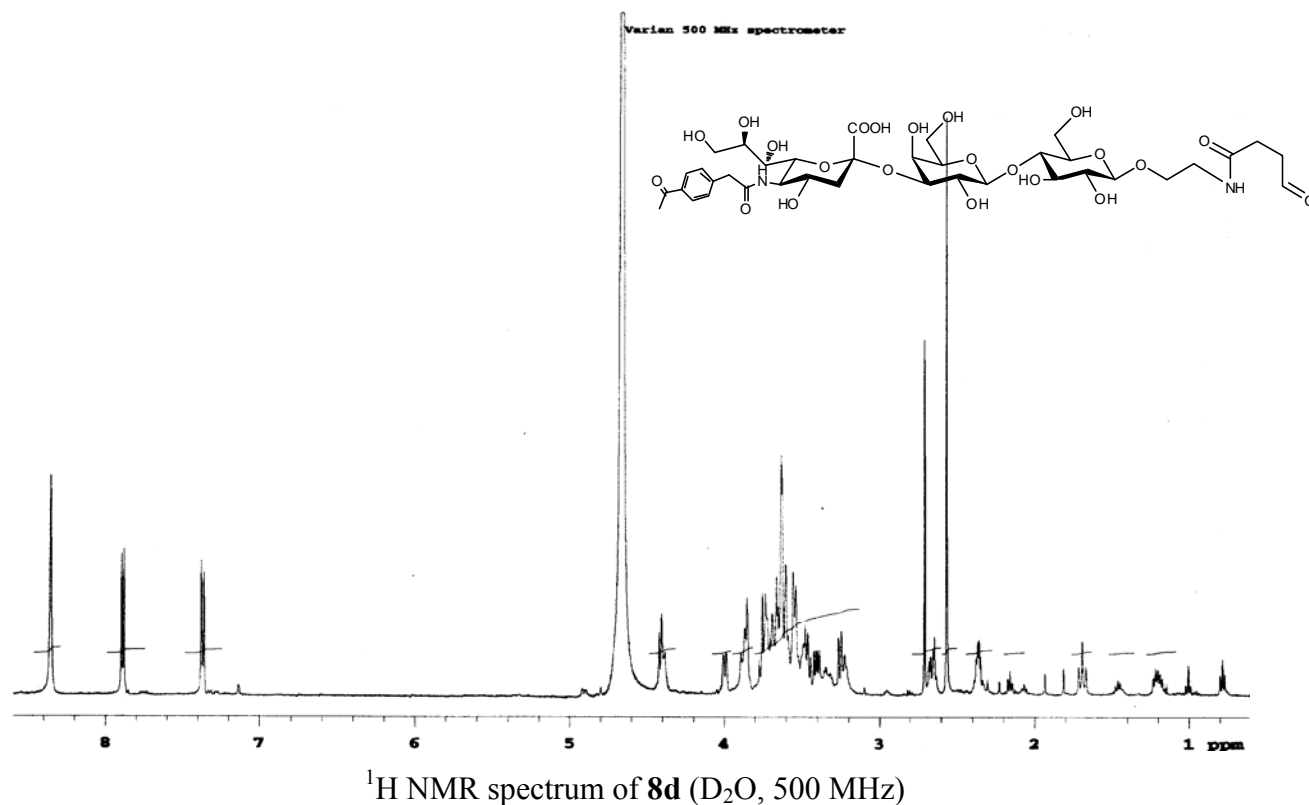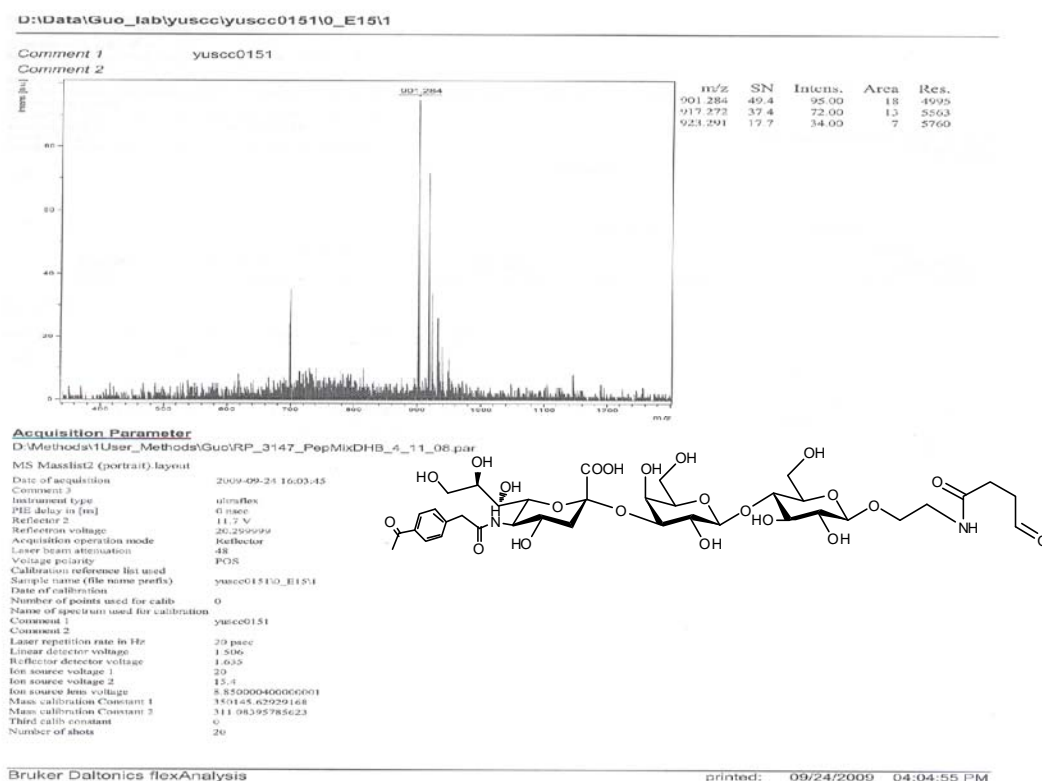

MALDI spectrum of **8d**
